1 **Title**

2 **From rare Copy Number Variations to biological processes in ADHD**

3

4 **Authors**

5 **Benjamin Harich<sup>1#</sup>, Monique van der Voet<sup>1#</sup>, Marieke Klein<sup>1</sup>, Pavel Čížek<sup>2,‡</sup>, Michaela**

6 **Fenckova<sup>1</sup>, Annette Schenck<sup>1,\*</sup>, Barbara Franke<sup>1,3,\*</sup>**

7

8 <sup>1</sup>Department of Human Genetics, Donders Institute for Brain, Cognition and Behaviour,

9 Radboud university medical center, Nijmegen, The Netherlands

10 <sup>2</sup>Centre for Molecular and Biomolecular Informatics, Radboud Institute for Molecular Life

11 Sciences, Radboud university medical center, Nijmegen, the Netherlands

12 <sup>3</sup>Department of Psychiatry, Donders Institute for Brain, Cognition and Behaviour, Radboud

13 university medical center, Nijmegen, The Netherlands

14 <sup>‡</sup>Former address

15 <sup>\*</sup> Co-corresponding authors

16 <sup>#</sup>These authors contributed equally to this work

17

18

19 **Abstract**

20 **Aim:** Attention-deficit/hyperactivity disorder (ADHD) is a highly heritable psychiatric disorder.

21 The objective of this study was to define ADHD-associated candidate genes, and their associated  
22 molecular modules and biological themes, based on the analysis of rare genetic variants.

23 **Methods:** We combined data from 11 published copy number variation (CNV) studies in 6176  
24 individuals with ADHD and 25026 controls and prioritized genes by applying an integrative  
25 strategy based on criteria including recurrence in ADHD individuals, absence in controls,  
26 complete coverage in copy number gains, and presence in the minimal region common to  
27 overlapping CNVs, as well as on protein-protein interactions and information from cross-species  
28 genotype-phenotype annotation.

29 **Results:** We localized 2241 eligible genes in the 1532 reported CNVs, of which we classified 432  
30 as high-priority ADHD candidate genes. The high-priority ADHD candidate genes were  
31 significantly co-expressed in the brain. A network of 66 genes was supported by ADHD-relevant  
32 phenotypes in the cross-species database. In addition, four significantly interconnected protein  
33 modules were found among the high-priority ADHD genes. A total of 26 genes were observed  
34 across all applied bioinformatic methods. Look-up in the latest genome-wide association study  
35 for ADHD showed that among those 26, *POLR3C* and *RBFOX1* were also supported by common  
36 genetic variants.

37 **Conclusions:** Integration of a stringent filtering procedure in CNV studies with suitable  
38 bioinformatics approaches can identify ADHD candidate genes at increased levels of credibility.  
39 Our pipeline provides additional insight in the molecular mechanisms underlying ADHD and  
40 allows prioritization of genes for functional validation in validated model organisms.



## 42 **Introduction**

43 Attention-deficit/hyperactivity disorder (ADHD) is one of the most common neuropsychiatric  
44 disorders, with a prevalence of 5–6% in children.(1) The disorder persists into adulthood in a  
45 significant proportion of affected individuals, resulting in a prevalence of 2.5–4.9% in adults.(2)  
46 The clinical symptoms of ADHD include age-inappropriate inattention, hyperactivity, and  
47 impulsivity.(3) Twin and adoption studies estimated a high heritability of 76% for ADHD.(3)

48 Identification of the genes implicated in ADHD and their molecular functions offers  
49 opportunities to understand the neurobiological mechanisms leading to ADHD and facilitates  
50 the development of diagnostic tools and new treatments. However, despite the high  
51 heritability, identification of ADHD risk genes has been difficult, mainly due to ADHD's complex  
52 genetic architecture.(2,4,5) To date, mainly genetic variants that frequently occur in the  
53 population have been investigated for their role in ADHD, either through studies of candidate  
54 genes or hypothesis-free genome-wide association studies (GWAS).(6,7) A recent GWAS meta-  
55 analysis identified the first 12 loci harbouring ADHD risk variants.(8) Another type of GWAS has  
56 focused on the association of rare copy number variants (CNVs) with ADHD. Such CNV GWASs  
57 have largely concentrated on rare events (primarily) observed in individuals diagnosed with  
58 ADHD. We analysed the 11 studies published to date that have detected rare CNVs in ADHD  
59 cases.(9,10,19,11–18) Those CNV GWASs implicated more than 2200 candidate genes in ADHD,  
60 though most have investigated rather limited sample sizes, and most of the CNVs were detected  
61 only in single patients. Based on the average mutation rate in-between individuals in the  
62 general population, single-patient rare findings have a high chance to be false positive; it is thus  
63 important to concentrate on repeatedly occurring copy number events.(20)

64 Data integration from various sources is an important strategy to move from genes to  
65 biologically meaningful modules. Examples for this come from publications on ADHD and  
66 related disorders.(21)(22) A publication on autism spectrum disorders showed how data  
67 integration enabled the identification of highly conserved gene clusters that improve our  
68 understanding of neuropsychiatric disorders.(21) Similarly, a recent study found a significant  
69 overlap of ADHD case CNVs with targets of the Fragile-X mental retardation protein (FMRP), a  
70 gene cluster involved in neurodevelopmental disorder risk.(22) In many cases, data integration  
71 currently takes place only across data modalities derived from studies in humans. This neglects  
72 the wealth of phenotypic information that can be derived from model organisms such as  
73 monkey, rat, mouse, zebrafish, and fruit fly.(7)

74 In this study, we surveyed and integrated data on CNVs associated with ADHD from  
75 existing publications, aiming to define robustly ADHD-associated genes, molecular modules, and  
76 biological themes underlying this disorder. We combined data from the 11 published ADHD CNV  
77 studies and applied an integrative strategy using redundancy criteria, data on protein-protein  
78 interactions, and – most innovative – employing information from cross-species genotype-  
79 phenotype annotation to prioritize candidate genes.(23,24) We classified 432 high-priority  
80 ADHD candidate genes, supported by co-expression, cross-species phenotype, and protein  
81 interaction information, with 26 genes highlighted across all approaches. Integration with data  
82 on common genetic variants showed that, amongst these 26 genes, *POLR3C* and *RBFOX1* were  
83 significantly associated with ADHD in the largest SNP-based GWAS meta-analysis to date.

84

85

## 86 **Materials and Methods**

87

### 88 **Identification of genes affected by ADHD CNVs**

89 Coordinates of rare CNVs occurring in individuals diagnosed with ADHD (cases) were retrieved  
90 from 11 studies published until now (9,10,19,11–18) Discovery samples of in total 6176 ADHD  
91 cases and 25026 controls provided the bases for the analysed studies (see **Supplementary Table**  
92 **1** for study characteristics). Coordinates of 1532 CNVs were retrieved for our analysis. These  
93 were mapped to the same reference human genome (hg19) using UCSC Lift Genome  
94 Annotations; the minimal ratio of bases that must remap was set to 0.95.(25) The CNV  
95 coordinates were used to retrieve RefGene information from the UCSC MySQL database, using a  
96 Structured Query Language (SQL) query (see **Supplementary Text 1**).(26) Information retrieved  
97 included the overlap with coding sequence, transcriptional direction, the total gene and CNV  
98 size in base pairs, exact gene start/end position, and percentage of gene coding sequence (CDS)  
99 represented by the CNV (**Supplementary Table 1**, Tab 1).

100

### 101 **Selection of genes recurrently affected in ADHD CNVs**

102 Transcript variants and biotypes were extracted for each CNV through a batch NCBI nucleotide  
103 query (**Supplementary Table 2**, Tab 1 for biotypes). For gene copy-number losses, we included  
104 all those genes entirely deleted or partially truncated. We also annotated, whether the N- or C-  
105 terminal region of transcripts were affected (**Supplementary Table 2**, Tab 1). For gene copy-  
106 number gains, we considered transcripts for which both a 2kb promoter and the coding region  
107 were entirely duplicated. For overlapping CNVs, the minimal region of overlap was identified to

108 narrow down the putative region involved in ADHD. Only mRNA-coding genes affected by CNVs  
109 in at least two cases with ADHD were selected for subsequent analyses (high-priority catalogue),  
110 given interpretability and possibility to perform cluster and protein-protein interaction analyses.

111

### 112 **Co-expression network analysis**

113 The BrainSpan developmental transcriptome data set (RNA-Seq Gencode v10) was used to  
114 investigate the overrepresentation of co-expressed genes of our high priority gene-set across all  
115 brain regions and developmental time points (embryo to adult), relative to the rest of the  
116 genome.(27) The expression coefficients for each mRNA-coding gene in all time points and brain  
117 regions in the BrainSpan data set were concatenated. The co-expression correlation score was  
118 calculated for each gene-pair. Gene-pairs with correlation score  $>0.3$  were assigned to a co-  
119 expression network, each node representing a single gene and each connection representing  
120 the correlation score. The sum of the correlation scores for the investigated gene-set and for  
121 10000 random gene-sets of the same size was calculated. An enrichment score was calculated  
122 by dividing the sum of the correlation scores per gene-set by the mean of the 10000 random  
123 gene-sets. P-values were calculated by comparing how many of the 10000 correlation scores of  
124 the random gene-sets were equal or higher than those of the investigated gene-set.

125

### 126 **Integrated cross-species phenotype and protein-protein interaction network**

127 We used the Monarch Initiative cross-species phenotype database to retrieve genes associated  
128 with an ADHD-related phenotype.(28) We defined core phenotypes, by selecting terms based  
129 on attention-deficit, hyperactivity, and impulsivity (**Supplementary Table 3**). The genes

130 connected to the cross-species core phenotypes of ADHD were subsequently superimposed to  
131 inter-species BioGRID protein interaction data. The interaction plot was visualised with  
132 Cytoscape 3.4.0.(29)

133

#### 134 **Identification of enriched-protein interaction modules**

135 Networks of physical interactions in the gene-set were assessed with DAPPLE 0.17(30,31) based  
136 on InWeb data with the following parameter settings: Number of permutations: 1000 with  
137 adaptive permutation function, Plot: true, Seed File: genes. A set of 432 high-priority genes  
138 formed the input for this analysis. The modules were visualised with Cytoscape 3.4.0.(29)

139

#### 140 **Gene-based and gene-set association analyses of prioritized modules with ADHD risk**

141 We used data from the recent meta-analysis of genome-wide association studies (GWAS) of  
142 20,183 patients with ADHD and 35,191 controls as performed by the Psychiatric Genomics  
143 Consortium (PGC) ADHD Working Group and the Danish iPSYCH Initiative.(8) Details on the  
144 samples and quality control can be found in the **Supplementary Methods** and in Demontis et  
145 al..(8)

146 Gene-based association analyses were performed using the Multi-marker Analysis of GenoMic  
147 Annotation (MAGMA) software package (version 1.05; for details see **Supplementary Text**  
148 **1**).(32) Genes were considered gene-wide significant if they reached the Bonferroni correction  
149 threshold-adjusted for the number of genes tested ( $p < 0.05/26$ ).

150

151



152

153

## 154 **Results**

### 155 **Identification of genes located in ADHD-associated CNVs and definition of high-priority gene-** 156 **set**

157 We extracted data from the 11 studies reporting rare CNVs in a total discovery sample of 6176  
158 ADHD cases and 25026 controls (see **Supplementary Table 1** for study characteristics).  
159 Coordinates of 1532 CNVs were retrieved, containing 2241 mRNA-coding candidate genes.

160 To identify the genes with an increased likelihood of contributing to ADHD pathology, we  
161 removed all genes duplicated with an incomplete promoter or coding sequence, or those  
162 aberrations found in controls across all studies (**Figure 1**). Genes identified in at least two rare  
163 CNVs were placed among the high-ranking candidates, due to their recurring nature. In addition,  
164 we calculated the minimal region common to overlapping CNVs, to narrow down the region of  
165 interest. Together, this resulted in a high-ranking list of 432 genes (**Supplementary Table 2,**  
166 **High-priority gene list**). The remaining 1316 genes, observed in only a single patient, were  
167 considered low-ranking (**Supplementary Table 2, Low-priority gene list**).

168

### 169 **High-priority ADHD candidate genes show increased co-expression in the brain**

170 It has been shown that proteins encoded by genes implicated in a genetically heterogeneous  
171 disorder tend to operate in common molecular pathways and processes.(22,33–36) To evaluate  
172 biological coherence of high-priority ADHD candidate genes in an unbiased way, we assessed  
173 their co-expression, a prerequisite for genes to jointly act in biological and developmental

174 processes, during the development of the most relevant tissue, the brain. We used the  
175 BrainSpan data set to test for gene co-expression and found a significant enrichment (E) of co-  
176 expressed genes in the high-priority gene-list ( $n=432$ ;  $E=1.04$ ,  $p=0.0044$ ). The low-priority genes  
177 ( $n=1316$ ;  $E=1.01$ ,  $p=0.28$ ) did not show significant co-expression enrichment.

178

### 179 **Cross-species phenotypes link a network of 66 high-priority candidate genes to ADHD core** 180 **symptoms**

181 We used the Monarch Initiative cross-species genotype–phenotype database, which contains  
182 phenotypic information from 58 species, to i) evaluate our gene prioritisation, ii) retrieve  
183 independent evidence for the relevance of our high-priority candidate gene-set for core ADHD  
184 features, and iii) identify functionally associated networks of high-priority genes with the ADHD  
185 core symptoms hyperactivity, attention-deficit, and impulsivity (for exact search terms see  
186 **Supplementary Table 3**).(28) Eighteen of the 432 high-priority ADHD CNV candidate genes were  
187 associated with cross-species terms related to attention and hyperactivity: attention-  
188 deficit/hyperactivity disorder, hyperactivity, increased vertical activity, hyperactive, and  
189 abnormally increased process quality locomotory exploration behaviour (**Figure 2**).

190 Based on the 18 genes validated by the cross-species approaches, we mined the cross-  
191 species Biological General Repository for Interaction Datasets (BioGRID) for interactors. This  
192 approach connected 48 additional genes of our high-priority catalogue to the cross-species  
193 terms (**Figure 2**).

194

195 **CNV-derived high-priority ADHD candidate genes form molecular modules implicating specific**  
196 **biological processes in ADHD pathology**

197 In addition to the cross-species approach, we also used the DAPPLE algorithm to identify  
198 significantly connected proteins among the 432 high-priority genes, based on the integration of  
199 human data from protein–protein, genetic, and pathway interactions.<sup>(30)</sup> This algorithm  
200 depicted 17 modules of connected proteins, each comprising of 2–15 ADHD high-priority  
201 candidates that directly interacted with each other (**Figure 3**). Taking both direct and indirect  
202 interactions into account, the hubs with significant connectivity contained 20 proteins (**Figure 3**  
203 and **Supplementary Table 4**). Of those, eight significant proteins were found in four direct  
204 protein-interaction modules (**Figure 3, Module 1–4**). Of those modules, ten proteins, WWOX,  
205 PPM1F, PARK2, TUBA3C, MAPK1, MYC, SEPT5, POLR2B, POLR1A, and POLR3C were found  
206 connected to cross-species core ADHD phenotypes (**Figure 2**).

207

208 **Two genes were found significantly associated with ADHD in common variant GWA studies**

209 A set of 26 genes amongst the original 432 high-priority CNV-derived ADHD candidate genes  
210 was consistently observed in all the different approaches we employed (**Figure 4, Table 1**). We  
211 performed gene-based association analyses for all 26 genes to evaluate whether these are also  
212 implicated in ADHD risk through common genetic variants, using the largest meta-analytic  
213 GWAS data for ADHD currently available ( $n=55374$ , PGC-iPSYCH ADHD working groups). Two  
214 genes were significantly associated with ADHD after correction for multiple testing. These genes  
215 were *POLR3C* ( $p= 0.000020373$ ) and *RBFOX1* ( $p= 0.00018202$ ) (see **Supplementary Table 5 and**

216 **Supplementary Figure 1**). Interestingly, the *POLR3C* gene was among the top 0.43% of the most  
217 strongly associated genes (rank 80 out of 18411).

218

## 219 **Discussion**

220 Here we present an integrated analysis of ADHD-associated CNVs identified in the first 11  
221 published studies. The limited power of the individual studies has been a crucial bottleneck in  
222 the definition of high priority ADHD candidate genes for further studies. From the 1532 CNVs  
223 described in the 11 studies, using strict criteria, we extracted 2241 mRNA-coding genes; this  
224 number is likely to contain many false positives due to the individually low occurrence of the  
225 rare CNVs (20), but the number is too large to allow each CNV to be studied in (animal) models  
226 for validation and mechanistic insights. Here, we aimed to prioritize genes linked to ADHD  
227 among the 2241 based on robustness of findings across different bioinformatics approaches  
228 used in an integrative manner and including both human and animal model-derived data. For  
229 this, we selected only those genes that were recurrently affected by CNVs in the patients and  
230 focussed on the minimal overlapping region of different CNVs in a region. Furthermore, we  
231 removed all genes that were affected by a CNV in healthy controls of other studies, and those  
232 that were only partially duplicated (lacking a full coding sequence and promoter). Those  
233 stringent criteria substantially reduced the number of candidate genes from the CNVs to one  
234 fifth of the original number. We showed that the selected 432 high-priority genes were  
235 significantly more co-expressed in the developing brain in comparison to random gene groups;  
236 this is evidence that our selection enriches for biologically coherent genes that are expressed at

237 the same time in the same tissue, a prerequisite for them to be involved in the same biological  
238 processes and cause similar phenotypes when disturbed.

239 Studies in model organisms can provide a wealth of phenotypic information, due to the  
240 high level of functional conservation across species. For ADHD, several model organisms have  
241 been shown to provide valid phenotypes. Those include monkey, rat, mouse, zebrafish, and fruit  
242 fly, where relevant phenotypes can be observed upon genetic manipulation or drug  
243 administration.(7) To identify biological processes underlying the selection of genes, we  
244 therefore took a novel approach that has not yet been applied to the field of neuropsychiatric  
245 disorders. We mined the Monarch Initiative database, which integrates genotype–phenotype  
246 relations across species, and found that 18 of the 432 high-priority genes, when manipulated in  
247 animal models, cause phenotypes that are face-valid to the ADHD core phenotypes attention-  
248 deficit, hyperactivity, and impulsivity. It is highly likely that the identified 18 genes whose  
249 protein-products form functional biological connections with genes/proteins for which detailed  
250 functional characterization, in particular information on ADHD-related phenotypes, is still  
251 lacking. We therefore retrieved direct interactors with the products of the 18 genes and  
252 identified an interconnected network of 66 proteins linked directly or indirectly to disease-  
253 relevant phenotypes (**Figure 2**). We also tested, whether our high-priority gene list itself formed  
254 protein-interaction modules with significantly interconnected proteins, which could provide us  
255 with information on biological processes. Indeed, we identified four modules comprising  
256 significantly connected proteins from our selection. Of these, the major modules, module 1 and  
257 module 4, connected to and were supported by ADHD-related phenotypes across species,  
258 showing the added value of cross-species analysis (**Figure 2**).

259           Module 1 contained two significantly linked proteins: WW-domain containing  
260 oxidoreductase (WWOX) and DNA-directed RNA polymerase I subunit RPA1 (POLR1A). WWOX,  
261 involved in autosomal recessive cerebellar ataxia-epilepsy-intellectual disability syndrome,(37)  
262 but no direct connections with ADHD are known. However, WWOX interacts with Protein  
263 phosphatase 1F (PPM1F), a Ser/Thr protein phosphatase that modulates RhoA and  
264 Ca<sup>2+</sup>/calmodulin-dependent protein kinase II pathways.(38,39) Other members of this  
265 phosphatase protein family are involved in mediating dopaminergic signalling via G-protein-  
266 coupled receptors.(40) In addition, miss-expression of PPM1F in the substantia nigra in  
267 Parkinson's patients may implicate PPM1F more directly in dopaminergic biology.(41) Dopamine  
268 signalling pathways have been found altered repeatedly in ADHD patients and form the basis for  
269 the most widely used pharmacological treatment approach.(42,43) As we can directly connect  
270 PPM1F to the cross-species term hyperactivity and indirectly link *WWOX*, *POLR1A*, *POLR2B*, and  
271 *POLR3C* to ADHD core phenotypes, we can extend the network with genes potentially regulating  
272 dopaminergic signalling (**Figure 2**). The RNA polymerase II subunits (POLR1A, POLR2B, and  
273 POLR3C) are involved in the regulation and finetuning of transcription.

274           Module 2 clusters proteins required for blood–brain barrier formation, which function in  
275 cell–cell junctions and communication. This module contains one significantly connected  
276 protein: Catenin alpha-3 (CTNNA3). This adherence junction protein, also known to be  
277 associated with ASD, likely modulates cerebral and ependymal regions through GABA-A  
278 receptor activation.(44) Tight junction protein ZO-1 (TJP1) forms the connection to the other  
279 three proteins in this module. This gene is affected by CNVs in 28 ADHD cases, being the most  
280 frequently occurring gene affected by copy number alterations in our survey of the ADHD CNV

281 studies (**Supplementary Table 1**). TJP1, together with Claudin-5 (CLDN5, affected in 12 ADHD  
282 cases) represents an important constituent of the blood–brain barrier.(45,46) Protein kinase C  
283 eta type (PRKCH) regulates TJP1.(47) Genes regulating neuronal cell adhesion are also  
284 significantly associated with ASD, schizophrenia, and bipolar disorder, raising the hypothesis  
285 that this mechanism plays a role across different neuropsychiatric disorders.(48,49) Due to the  
286 high number of ADHD cases with a CNV in this module, we postulate that cell–cell junctions play  
287 an important role in ADHD.

288         Module 3 contains two proteins that directly interact with each other: the significantly  
289 interconnected Density-regulated protein (DENR) and the Eukaryotic elongation factor 2 kinase  
290 (EEF2K), both involved in regulation and initiation of translation.(50) Regulation and initiation of  
291 translation has been linked to neuropsychiatric disorders including ADHD, through the  
292 regulation of brain-derived neurotrophic factor (BDNF).(51–53) Based on the repeated  
293 association and the described functional work, we suggest the involvement of transcriptional  
294 regulation as one of the mechanisms that modulate the ADHD risk.

295         Module 4 contains four significantly connected proteins: BIRC6, RAB15, SEPT5, and  
296 PHKB. Baculoviral IAP repeat-containing protein 6 (BIRC6 or Bruce) is an inhibitor of apoptosis  
297 involved in prostate cancer progression, but also acts in neuronal protection against  
298 apoptosis.(54,55) Ras-related protein Rab-15 (RAB15) is a direct connector of BIRC6, it plays a  
299 role in regulating synaptic vesicle membrane flow in nerve terminals.(56,57) Septin-5 (SEPT5) is  
300 involved in the binding of SNARE complexes, inhibiting synaptic vesicle exocytosis.(58) Recent  
301 studies have shown that manipulation of this gene in mice leads to altered social interaction and  
302 altered affective behaviours.(59,60) Phosphorylase b kinase regulatory subunit beta (PHKB) is

303 involved in glycogen metabolism and has been linked to neuronal plasticity.(61) Other proteins  
304 in the hub link to the cross-species phenotype term hyperactivity and attention-  
305 deficit/hyperactivity disorder: MAPK1 is directly connected, and SEPT5, PARK2, MYC, and  
306 TUBA3C are indirectly connected. They are thus prime candidates for further evaluation in  
307 functional assays.

308         While this study started from rare CNVs, we found corroborating evidence for several of  
309 the genes implicated in ADHD also in studies of common genetic variants. Among the 26 CNV-  
310 affected genes most consistently observed across the different bioinformatics approaches  
311 applied in this study, we also found *RBFOX1* and *POLR3C* to be associated with the disorder in  
312 the largest SNP-based GWAS meta-analysis to date. In a recent study of Lee et al., *RBFOX1* was  
313 discovered to be the second most pleiotropic locus of the genome-wide meta-analysis amongst  
314 eight psychiatric disorders.(62) *RBFOX1* encodes a splice regulator which is regulating several  
315 genes involved in neuronal development and which is mainly expressed in the brain.(62–65)  
316 Animal models have shown that *RBFOX1* is involved in mouse corticogenesis and aggressive  
317 behaviours.(62,64,66,67) *POLR3C* is included in a well-known small CNV located at 1q21.1,  
318 which contributes to a broad spectrum of phenotypes in addition to ADHD, including  
319 morphological features and autism spectrum disorders (ASD).(68,69) Genes listed in **Table 1**  
320 may be viewed as having, individually, the highest credibility as ADHD candidate genes. We  
321 therefore recommend to prioritize these genes in future studies searching for rare (single  
322 nucleotide) variants in ADHD and for functional characterization of gene-disease pathways.  
323 **Table 1** shows that also among these 26 genes, common biological themes are present, such as



324 transcription (already highlighted by the module analyse), mitochondria biology, mRNA  
325 metabolism, and cytoskeleton.

326 Our study should be viewed in the light of some strengths and limitations. We show that  
327 filtering based on recurrent CNVs restricted to ADHD cases in conjunction with complementary  
328 bioinformatics methods bares great potential to prioritise ADHD candidate genes. For the first  
329 time, cross-species phenotypes were used to identify candidate genes linked to ADHD core  
330 phenotypes, pointing to high-priority candidate genes. Several of those form significantly  
331 connected protein networks characterized by shared functions. The selection of genes analysed  
332 in this study is extensive, but is by no means exhaustive. First, it is important to note that by  
333 only analysing recurrent CNVs and focussing on the minimal regions of overlap amongst CNVs in  
334 the same region, genes with relevance for ADHD may be overlooked; on the other hand, the  
335 stringent evidence-based filtering holds high potential to uncover the most ADHD-relevant  
336 biological pathways. In addition, neither the surveyed CNV studies nor our study consider  
337 effects of CNVs onto the surrounding genetic landscape. A duplicated CNV translocation, for  
338 example, can have an impact on the expression of genes in the chromosomal region at the site  
339 of insertion, which alone or together with the duplicated genes can contribute to ADHD  
340 phenotypes.(70) Lastly, the criteria used for selection of CNVs were not identical across the 11  
341 source studies.

342 In conclusion, our study shows that stringent filtering in CNV studies in combination with  
343 a complementary battery of bioinformatics approaches can identify ADHD candidate genes at  
344 increased levels of credibility. We suggest that testing genes operating in the identified modules  
345 and those 26 consistently found in all approaches employed here in animal models like rat,

346 mouse, zebrafish, and fruit fly,(7) for their ability to modulate behaviour will provide further  
347 insights into the mechanistic pathways and biology of ADHD.

348

349

350 **Legends to figures**

351

352 **Figure 1. CNV processing scheme to establish high- and low-priority ADHD candidate genes.**

353 (a) Collection: CNV coordinates were extracted from 11 different studies reporting rare CNVs in  
354 ADHD cohorts (see **Supplementary Table 1**). (b) Cleaning: CNVs identified in controls and copy-  
355 number gains with an incomplete promoter and coding sequences were excluded. (c)  
356 Prioritisation: a high-priority gene list was generated by excluding genes found only in a single  
357 individual with ADHD and genes not present in the minimal overlapping region.

358

359 **Figure 2. Cross-species phenotypes link an interaction network of 66 high-priority candidate**  
360 **genes to ADHD core symptoms**

361 Of the 432 high-priority ADHD CNV candidate genes, 18 were found in the Monarch Initiative  
362 database to have a core ADHD phenotype relating to hyperactivity, attention deficit, and  
363 impulsivity. These 18 genes were used as seeds to create a BioGRID interaction network, using  
364 cross-species information on direct protein–protein interactions, genetic interactions and  
365 predicted interactions. We found a highly interconnected network with 48 secondary  
366 interactors from the high-priority gene list. Dashed lines show whether a connection was found  
367 once (·) or multiple times (--) in the BioGRID database.

368

369 **Figure 3. DAPPLE interaction network identifies four molecular modules with significantly**  
370 **connected proteins.**

371 A DAPPLE analysis was performed to identify highly related protein–protein interaction clusters  
372 based on direct- and indirect connectivity. Four modules containing significantly connected  
373 proteins were identified.

374

375 **Figure 4. Visual representation of the gene-selection process.**

376 A summary of the analysis process undertaken in the paper, starting from 2241 genes prioritised  
377 to 432 high-priority candidates (**Figure 1**), followed by a cross-species phenotype and BioGRID  
378 analysis of 66 genes (**Figure 2**) and DAPPLE analysis with 62 candidates (**Figure 3**). In total 26  
379 candidates overlap across analyses (**Table 1**).

380

381 **Table 1.** The 26 genes consistently identified across all bioinformatics approaches employed in  
382 the current study.

383

384 **Supplementary Figure 1:** Regional association of genes most strongly associated with ADHD.  
385 Regional association plots showing association signal for ADHD in the PGC-iPSYCH GWAS meta-  
386 analysis data for the two most strongly associated high priority ADHD candidate genes, including  
387 flanking regions of 100kb. (A) *POLR3C* locus with the top-SNP (rs376814422) indicated by the  
388 black arrow. (B) *RBFOX1* locus with the top-SNP (rs6500945) indicated by the purple dot. Results  
389 are shown as  $-\log(p\text{-value})$  for genotyped and imputed SNPs. The colour of each marker reflects  
390 its LD ( $r^2$ ) with the SNP indicated by the purple dot. The recombination rate is plotted in blue.  
391 cm/Mb, centimorgan/megabase. Chr, chromosome.

392 **Supplementary Table 1:** Full lists of raw input data points extracted from 11 ADHD CNV studies  
393 (Tab 1), high-priority gene selection (Tab 2) and low-priority gene selection (Tab 3).

394  
395 **Supplementary Table 2:** Full list of all selected ADHD core phenotype labels in the Monarch  
396 Initiative database query.

397 **Supplementary Table 3:** Overview of all included studies reporting rare CNVs in an ADHD  
398 cohort.

399 **Supplementary Table 4:** Significant connected genes of the high-priority gene list after DAPPLE  
400 analysis and the assigned modules in **Figure 3**.

401 **Supplementary Table 5:** Results MAGMA analysis of the 26 genes consistently observed in all  
402 the different approaches

403 **Supplementary Methods 1:** SQL query script for the UCSC database, GWAS meta-analyses data  
404 set for ADHD and Gene-based association analyses for ADHD GWAS meta-analyses data

405

406

407

408 **Author contribution**

409 BH: performed data analysis and created interaction networks, contributed to manuscript  
410 writing. MV: conceived the study, performed data analysis, processed CNVs using SQL, curated  
411 cross-species Monarch Initiative and BioGRID information, contributed to supervision and  
412 manuscript writing. MK: Performed gene-based association analyses and helped with data  
413 interpretation. PC and MF: performed the co-expression analysis. BF: contributed to supervision  
414 and manuscript writing. AS: conceived the study, contributed to supervision and manuscript  
415 writing. All authors proof-read the manuscript.

416

417 **Acknowledgements**

418 Benjamin Harich was funded by a Radboud University Medical Center PhD grant. Monique van  
419 der Voet's research was supported by the Netherlands Organization for Scientific Research  
420 (NWO) VENI grant (grant 91.614.084). Marieke Klein was supported by a grant from the  
421 Netherlands Science Agenda (NWA) for the NeuroLabNL project (grant 400.17.602). Barbara  
422 Franke's contribution was supported by a personal Vici grant from the Netherlands Organization  
423 for Scientific Research (NWO; grant 016-130-669). This work also received support from the  
424 European Community's Horizon 2020 (H2020/2014 – 2020) European Trainings Network  
425 Programme MiND under grant agreement n° 643051 to Barbara Franke and Annette Schenck.  
426 Additional support was received from the ECNP Network ADHD across the Lifespan and the  
427 European Community's Horizon 2020 Programme under grant agreements n° 667302 (CoCA)  
428 and n° 728018 (Eat2beNICE). This report reflects only the authors' views, and the European  
429 Union is not liable for any use that may be made of the information contained therein.

430 **Conflict of interest**

431 Barbara Franke has received educational speaking fees from Medice. None of the other authors  
432 report conflicts of interest.

433

434 **Bibliography**

- 435 1. Polanczyk G, De Lima MS, Horta BL, Biederman J, Rohde LA. The worldwide prevalence of  
436 ADHD: A systematic review and meta-regression analysis. *Am J Psychiatry* [Internet]. 2007  
437 Jun;164(6):942–8. Available from: <http://www.ncbi.nlm.nih.gov/pubmed/17541055>
- 438 2. Franke B, Faraone S V, Asherson P, Buitelaar J, Bau CHD, Ramos-Quiroga JA, et al. The  
439 genetics of attention deficit/hyperactivity disorder in adults, a review. *Mol Psychiatry*  
440 [Internet]. 2012;17(10):960–87. Available from:  
441 <http://dx.doi.org/10.1038/mp.2011.138>  
442 1.138
- 443 3. Faraone S V, Asherson P, Banaschewski T, Biederman J, Buitelaar JK, Ramos-Quiroga JA, et  
444 al. Attention-deficit/hyperactivity disorder. Vol. 1, *Nature reviews. Disease primers*.  
445 England; 2015. p. 15020.
- 446 4. Gizer IR, Ficks C, Waldman ID. Candidate gene studies of ADHD: a meta-analytic review.  
447 *Hum Genet* [Internet]. 2009 Jul [cited 2014 May 24];126(1):51–90. Available from:  
448 <http://www.ncbi.nlm.nih.gov/pubmed/19506906>
- 449 5. Franke B, Neale BM, Faraone S V. Genome-wide association studies in ADHD. *Hum Genet*  
450 [Internet]. 2009 Jul [cited 2012 Mar 14];126(1):13–50. Available from:  
451 <http://www.ncbi.nlm.nih.gov/pubmed/19384554>

- 452 6. Faraone S V., Asherson P, Banaschewski T, Biederman J, Buitelaar JK, Ramos-Quiroga JA,  
453 et al. Attention-deficit/hyperactivity disorder. *Nat Rev Dis Prim* [Internet]. 2015;1:15020.  
454 Available from: <http://www.nature.com/articles/nrdp201520>
- 455 7. Klein M, Onnink M, van Donkelaar M, Wolfers T, Harich B, Shi Y, et al. Brain imaging  
456 genetics in ADHD and beyond - Mapping pathways from gene to disorder at different  
457 levels of complexity. *Neurosci Biobehav Rev*. 2017 Jan;80:115–55.
- 458 8. Demontis D, Walters RK, Martin J, Mattheisen M, Als TD, Agerbo E, et al. Discovery of the  
459 first genome-wide significant risk loci for attention deficit/hyperactivity disorder. *Nat*  
460 *Genet* [Internet]. 2019;51(1):63–75. Available from: [https://doi.org/10.1038/s41588-018-](https://doi.org/10.1038/s41588-018-0269-7)  
461 [0269-7](https://doi.org/10.1038/s41588-018-0269-7)
- 462 9. Williams N, Franke B. Genome-wide analysis of copy number variants in attention deficit  
463 hyperactivity disorder: the role of rare variants and duplications at 15q13.3. *Am J*  
464 *Psychiatry*. 2012;169(2):195–204.
- 465 10. Williams NM, Zaharieva I, Martin A, Langley K, Mantripragada K, Fossdal R, et al. Rare  
466 chromosomal deletions and duplications in attention-deficit hyperactivity disorder: a  
467 genome-wide analysis. *Lancet* [Internet]. 2010 Oct 23 [cited 2013 Nov  
468 15];376(9750):1401–8. Available from:  
469 [http://www.pubmedcentral.nih.gov/articlerender.fcgi?artid=2965350&tool=pmcentrez&](http://www.pubmedcentral.nih.gov/articlerender.fcgi?artid=2965350&tool=pmcentrez&rendertype=abstract)  
470 [rendertype=abstract](http://www.pubmedcentral.nih.gov/articlerender.fcgi?artid=2965350&tool=pmcentrez&rendertype=abstract)
- 471 11. Stergiakouli E. Investigating the contribution of common genetic variants to the risk and  
472 pathogenesis of ADHD. *Am J Psychiatry* [Internet]. 2012 [cited 2014 Feb 11];169:186–94.  
473 Available from: <http://journals.psychiatryonline.org/article.aspx?articleid=483662>



- 474 12. Ramos-Quiroga J-A, Sánchez-Mora C, Casas M, Garcia-Martínez I, Bosch R, Nogueira M, et  
475 al. Genome-wide copy number variation analysis in adult attention-deficit and  
476 hyperactivity disorder. *J Psychiatr Res* [Internet]. 2014 Feb [cited 2014 Aug 11];49:60–7.  
477 Available from: <http://www.ncbi.nlm.nih.gov/pubmed/24269040>
- 478 13. Martin J, Cooper M, Hamshere ML, Pocklington A, Scherer SW, Kent L, et al. Biological  
479 overlap of attention-deficit/hyperactivity disorder and autism spectrum disorder:  
480 evidence from copy number variants. *J Am Acad Child Adolesc Psychiatry* [Internet]. 2014  
481 Jul [cited 2014 Jul 13];53(7):761-770.e26. Available from:  
482 [http://www.pubmedcentral.nih.gov/articlerender.fcgi?artid=4074351&tool=pmcentrez&](http://www.pubmedcentral.nih.gov/articlerender.fcgi?artid=4074351&tool=pmcentrez&rendertype=abstract)  
483 [rendertype=abstract](http://www.pubmedcentral.nih.gov/articlerender.fcgi?artid=4074351&tool=pmcentrez&rendertype=abstract)
- 484 14. Lionel AC, Crosbie J, Barbosa N, Goodale T, Thiruvahindrapuram B, Rickaby J, et al. Rare  
485 copy number variation discovery and cross-disorder comparisons identify risk genes for  
486 ADHD. *Sci Transl Med* [Internet]. 2011 Aug 10 [cited 2014 Aug 9];3(95):95ra75. Available  
487 from: <http://www.ncbi.nlm.nih.gov/pubmed/21832240>
- 488 15. Lesch K-P, Selch S, Renner TJ, Jacob C, Nguyen TT, Hahn T, et al. Genome-wide copy  
489 number variation analysis in attention-deficit/hyperactivity disorder: association with  
490 neuropeptide Y gene dosage in an extended pedigree. *Mol Psychiatry* [Internet]. 2011  
491 May [cited 2012 Oct 26];16(5):491–503. Available from:  
492 <http://www.ncbi.nlm.nih.gov/pubmed/20308990>
- 493 16. Jarick I, Volckmar A-L, Pütter C, Pechlivanis S, Nguyen TT, Dauvermann MR, et al.  
494 Genome-wide analysis of rare copy number variations reveals PARK2 as a candidate gene  
495 for attention-deficit/hyperactivity disorder. *Mol Psychiatry* [Internet]. 2014 Jan [cited

- 496 2014 Jul 19];19(1):115–21. Available from:  
497 [http://www.pubmedcentral.nih.gov/articlerender.fcgi?artid=3873032&tool=pmcentrez&](http://www.pubmedcentral.nih.gov/articlerender.fcgi?artid=3873032&tool=pmcentrez&rendertype=abstract)  
498 [rendertype=abstract](http://www.pubmedcentral.nih.gov/articlerender.fcgi?artid=3873032&tool=pmcentrez&rendertype=abstract)
- 499 17. Elia J, Glessner JT, Wang K, Takahashi N, Shtir CJ, Hadley D, et al. Genome-wide copy  
500 number variation study associates metabotropic glutamate receptor gene networks with  
501 attention deficit hyperactivity disorder. *Nat Genet* [Internet]. 2012 Jan [cited 2012 Oct  
502 4];44(1):78–84. Available from: <http://www.ncbi.nlm.nih.gov/pubmed/22138692>
- 503 18. Elia J, Gai X, Xie HM, Perin JC, Geiger E, Glessner JT, et al. Rare structural variants found in  
504 attention-deficit hyperactivity disorder are preferentially associated with  
505 neurodevelopmental genes. *Mol Psychiatry* [Internet]. 2010 Jun [cited 2012 Oct  
506 26];15(6):637–46. Available from:  
507 [http://www.pubmedcentral.nih.gov/articlerender.fcgi?artid=2877197&tool=pmcentrez&](http://www.pubmedcentral.nih.gov/articlerender.fcgi?artid=2877197&tool=pmcentrez&rendertype=abstract)  
508 [rendertype=abstract](http://www.pubmedcentral.nih.gov/articlerender.fcgi?artid=2877197&tool=pmcentrez&rendertype=abstract)
- 509 19. Yang L, Neale BM, Liu L, Lee SH, Wray NR, Ji N, et al. Polygenic transmission and complex  
510 neuro developmental network for attention deficit hyperactivity disorder: Genome-wide  
511 association study of both common and rare variants. *Am J Med Genet Part B*  
512 *Neuropsychiatr Genet* [Internet]. 2013;162(5):419–30. Available from:  
513 <http://doi.wiley.com/10.1002/ajmg.b.32169>
- 514 20. Gratten J, Visscher PM, Mowry BJ, Wray NR. Interpreting the role of de novo protein-  
515 coding mutations in neuropsychiatric disease. *Nat Genet* [Internet]. 2013;45(3):234–8.  
516 Available from: <http://www.ncbi.nlm.nih.gov/pubmed/23438595>
- 517 21. Hormozdiari F, Penn O, Borenstein E, Eichler EE. The discovery of integrated gene

- 518 networks for autism and related disorders. *Genome Res.* 2015 Jan;25(1):142–54.
- 519 22. Thapar A, Martin J, Mick E, Vázquez AA, Langley K, Scherer SW, et al. Psychiatric gene  
520 discoveries shape evidence on ADHD 's biology. 2015;21(9):1–6.
- 521 23. Doelken SC, Köhler S, Mungall CJ, Gkoutos G V, Ruef BJ, Smith C, et al. Phenotypic overlap  
522 in the contribution of individual genes to CNV pathogenicity revealed by cross-species  
523 computational analysis of single-gene mutations in humans, mice and zebrafish. *Dis*  
524 *Model Mech* [Internet]. 2013 Mar [cited 2014 Feb 11];6(2):358–72. Available from:  
525 [http://www.pubmedcentral.nih.gov/articlerender.fcgi?artid=3597018&tool=pmcentrez&](http://www.pubmedcentral.nih.gov/articlerender.fcgi?artid=3597018&tool=pmcentrez&rendertype=abstract)  
526 [rendertype=abstract](http://www.pubmedcentral.nih.gov/articlerender.fcgi?artid=3597018&tool=pmcentrez&rendertype=abstract)
- 527 24. Köhler S, Doelken SC, Ruef BJ, Bauer S, Washington N, Westerfield M, et al. Construction  
528 and accessibility of a cross-species phenotype ontology along with gene annotations for  
529 biomedical research. *F1000Research* [Internet]. 2013 Jan [cited 2014 Feb 3];2:1–12.  
530 Available from:  
531 [http://www.pubmedcentral.nih.gov/articlerender.fcgi?artid=3799545&tool=pmcentrez&](http://www.pubmedcentral.nih.gov/articlerender.fcgi?artid=3799545&tool=pmcentrez&rendertype=abstract)  
532 [rendertype=abstract](http://www.pubmedcentral.nih.gov/articlerender.fcgi?artid=3799545&tool=pmcentrez&rendertype=abstract)
- 533 25. UCSC Lift Genome Annotations [Internet]. Available from: [https://genome.ucsc.edu/cgi-](https://genome.ucsc.edu/cgi-bin/hgLiftOver)  
534 [bin/hgLiftOver](https://genome.ucsc.edu/cgi-bin/hgLiftOver)
- 535 26. UCSC MySQL database [Internet]. Available from: [genome-mysql.cse.ucsc.edu](http://genome-mysql.cse.ucsc.edu)
- 536 27. Hawrylycz MJ, Lein ES, Guillozet-Bongaarts AL, Shen EH, Ng L, Miller JA, et al. An  
537 anatomically comprehensive atlas of the adult human brain transcriptome. *Nature*  
538 [Internet]. 2012 Sep 20;489(7416):391–9. Available from:  
539 <http://dx.doi.org/10.1038/nature11405>

- 540 28. Mungall CJ, McMurry JA, Kohler S, Balhoff JP, Borromeo C, Brush M, et al. The Monarch  
541 Initiative: An integrative data and analytic platform connecting phenotypes to genotypes  
542 across species. *Nucleic Acids Res.* 2017;45(D1):D712–22.
- 543 29. Cline M, Smoot M, Cerami E. Integration of biological networks and gene expression data  
544 using Cytoscape. *Nat Protoc [Internet].* 2007;2(10):2366–82. Available from:  
545 [http://www.pubmedcentral.nih.gov/articlerender.fcgi?artid=3685583&tool=pmcentrez&](http://www.pubmedcentral.nih.gov/articlerender.fcgi?artid=3685583&tool=pmcentrez&rendertype=abstract%5Cnhttp://www.nature.com/nprot/journal/v2/n10/abs/nprot.2007.324.html)  
546 [rendertype=abstract%5Cnhttp://www.nature.com/nprot/journal/v2/n10/abs/nprot.2007](http://www.nature.com/nprot/journal/v2/n10/abs/nprot.2007.324.html)  
547 [.324.html](http://www.nature.com/nprot/journal/v2/n10/abs/nprot.2007.324.html)
- 548 30. Rossin EJ, Lage K, Raychaudhuri S, Xavier RJ, Tatar D, Benita Y, et al. Proteins encoded in  
549 genomic regions associated with immune-mediated disease physically interact and  
550 suggest underlying biology. *PLoS Genet [Internet].* 2011 Jan [cited 2014 Jul  
551 22];7(1):e1001273. Available from:  
552 [http://www.pubmedcentral.nih.gov/articlerender.fcgi?artid=3020935&tool=pmcentrez&](http://www.pubmedcentral.nih.gov/articlerender.fcgi?artid=3020935&tool=pmcentrez&rendertype=abstract)  
553 [rendertype=abstract](http://www.pubmedcentral.nih.gov/articlerender.fcgi?artid=3020935&tool=pmcentrez&rendertype=abstract)
- 554 31. Reich M, Liefeld T, Gould J, Lerner J, Tamayo P, Mesirov JP. GenePattern 2.0. *Nat Genet*  
555 *[Internet].* 2006;38(5):500–1. Available from:  
556 <http://www.ncbi.nlm.nih.gov/pubmed/16642009>
- 557 32. de Leeuw CA, Mooij JM, Heskes T, Posthuma D. MAGMA: Generalized Gene-Set Analysis  
558 of GWAS Data. *PLoS Comput Biol.* 2015;11(4):1–19.
- 559 33. O’Dushlaine C, Rossin L, Lee PH, Duncan L, Parikshak NN, Newhouse S, et al. Psychiatric  
560 genome-wide association study analyses implicate neuronal, immune and histone  
561 pathways. *Nat Neurosci [Internet].* 2015;18(2):199–209. Available from:

- 562 <http://www.nature.com/doi/10.1038/nn.3922><http://www.ncbi.nlm.nih.gov/p>
- 563 <ubmed/25599223><http://www.pubmedcentral.nih.gov/articlerender.fcgi?artid=PMC>
- 564 <4378867><http://www.ncbi.nlm.nih.gov/pubmed/25599223><http://www.pubme>
- 565 <dcentral.nih.gov/articlerender>
- 566 34. Mooney MA, McWeeney SK, Faraone S, Hinney A, Hebebrand J, Nigg JT, et al. Pathway
- 567 analysis in attention deficit hyperactivity disorder: An ensemble approach. *Am J Med*
- 568 *Genet Part B Neuropsychiatr Genet* [Internet]. 2016;171:815–26. Available from:
- 569 <http://doi.wiley.com/10.1002/ajmg.b.32446>
- 570 35. Subramanian M, Timmerman CK, Schwartz JL, Pham DL, Meffert MK. Characterizing
- 571 autism spectrum disorders by key biochemical pathways. 2015;9(September):1–18.
- 572 36. Kochinke K, Zweier C, Nijhof B, Fenckova M, Cizek P, Honti F, et al. Systematic Phenomics
- 573 Analysis Deconvolutes Genes Mutated in Intellectual Disability into Biologically Coherent
- 574 Modules. *Am J Hum Genet* [Internet]. 2016;98(1):149–64. Available from:
- 575 <http://dx.doi.org/10.1016/j.ajhg.2015.11.024>
- 576 37. Mallaret M, Synofzik M, Lee J, Sagum CA, Mahajnah M, Sharkia R, et al. The tumour
- 577 suppressor gene WWOX is mutated in autosomal recessive cerebellar ataxia with epilepsy
- 578 and mental retardation. *Brain*. 2014;137(2):411–9.
- 579 38. Harvey BP, Banga SS, Ozer HL. Regulation of the multifunctional Ca<sup>2+</sup>/calmodulin-
- 580 dependent protein kinase II by the PP2C phosphatase PPM1F in fibroblasts. *J Biol Chem*.
- 581 2004;279(23):24889–98.
- 582 39. Xie Y, Tan E-J, Wee S, Manser E, Lim L, Koh C-G. Functional interactions between
- 583 phosphatase POPX2 and mDia modulate RhoA pathways. *J Cell Sci*. 2008;121(Pt 4):514–

- 584 21.
- 585 40. Marion S, Urs NM, Peterson SM, Sotnikova TD, Beaulieu J-M, Gainetdinov RR, et al.  
586 Dopamine D2 Receptor Relies upon PPM/PP2C Protein Phosphatases to Dephosphorylate  
587 Huntingtin Protein. *J Biol Chem* [Internet]. 2014 Apr 25;289(17):11715–24. Available  
588 from: <http://www.ncbi.nlm.nih.gov/pmc/articles/PMC4002081/>
- 589 41. Simunovic F, Yi M, Wang Y, Macey L, Brown LT, Krichevsky AM, et al. Gene expression  
590 profiling of substantia nigra dopamine neurons: further insights into Parkinson’s disease  
591 pathology. *Brain*. 2009;132(7):1795–809.
- 592 42. Swanson J., Flodman P, Kennedy J, Spence MA, Moyzis R, Schuck S, et al. Dopamine genes  
593 and ADHD. *Neurosci Biobehav Rev* [Internet]. 2005 Jan [cited 2017 Aug 22];24(1):21–5.  
594 Available from: <http://linkinghub.elsevier.com/retrieve/pii/S0149763499000627>
- 595 43. Volkow ND, Wang G-J, Fowler JS, Ding Y-S. Imaging the Effects of Methylphenidate on  
596 Brain Dopamine: New Model on Its Therapeutic Actions for Attention-  
597 Deficit/Hyperactivity Disorder. *Biol Psychiatry* [Internet]. 2005 Jun [cited 2017 Aug  
598 22];57(11):1410–5. Available from:  
599 <http://linkinghub.elsevier.com/retrieve/pii/S0006322304011631>
- 600 44. Folmsbee SS, Wilcox DR, Tyberghein K, De Bleser P, Tourtellotte WG, van Hengel J, et al.  
601  $\alpha$ T-catenin in restricted brain cell types and its potential connection to autism. *J Mol*  
602 *Psychiatry* [Internet]. 2016;4(1):2. Available from:  
603 <http://jmolcularpsychiatry.biomedcentral.com/articles/10.1186/s40303-016-0017-9>
- 604 45. Lee J, Freeman JL. Zebrafish as a Model for Developmental Neurotoxicity Assessment: The  
605 Application of the Zebrafish in Defining the Effects of Arsenic, Methylmercury, or Lead on

- 606 Early Neurodevelopment. *Toxics* [Internet]. 2014;2(3):464–95. Available from:  
607 <http://www.mdpi.com/2305-6304/2/3/464/>
- 608 46. Greene C, Campbell M. Tight junction modulation of the blood brain barrier: CNS delivery  
609 of small molecules. *Tissue Barriers* [Internet]. 2016 Jan 2;4(1):e1138017. Available from:  
610 <http://dx.doi.org/10.1080/21688370.2015.1138017>
- 611 47. Suzuki T, Elias BC, Seth A, Shen L, Turner JR, Giorgianni F, et al. PKC eta regulates occludin  
612 phosphorylation and epithelial tight junction integrity. *Proc Natl Acad Sci* [Internet].  
613 2009;106(1):61–6. Available from:  
614 [http://eutils.ncbi.nlm.nih.gov/entrez/eutils/elink.fcgi?dbfrom=pubmed&id=19114660&re  
615 tmode=ref&cmd=prlinks%5Cnpapers3://publication/doi/10.1073/pnas.0802741106](http://eutils.ncbi.nlm.nih.gov/entrez/eutils/elink.fcgi?dbfrom=pubmed&id=19114660&retmode=ref&cmd=prlinks%5Cnpapers3://publication/doi/10.1073/pnas.0802741106)
- 616 48. Marui T, Funatogawa I, Koishi S, Yamamoto K, Matsumoto H, Hashimoto O, et al.  
617 Association of the neuronal cell adhesion molecule (NRCAM) gene variants with autism.  
618 *Int J Neuropsychopharmacol*. 2009;12(1):1–10.
- 619 49. O’Dushlaine C, Kenny E, Heron E, Donohoe G, Gill M, Morris D, et al. Molecular pathways  
620 involved in neuronal cell adhesion and membrane scaffolding contribute to schizophrenia  
621 and bipolar disorder susceptibility. *Mol Psychiatry*. 2011;16(3):286–92.
- 622 50. Smith EM, Proud CG. cdc2–cyclin B regulates eEF2 kinase activity in a cell cycle- and  
623 amino acid-dependent manner. *EMBO J* [Internet]. 2008 Mar 13;27(7):1005 LP – 1016.  
624 Available from: <http://emboj.embopress.org/content/27/7/1005.abstract>
- 625 51. Lipton JO, Sahin M. The neurology of mTOR. *Neuron* [Internet]. 2014;84(2):275–91.  
626 Available from: <http://www.ncbi.nlm.nih.gov/pubmed/25374355>
- 627 52. Autry AE, Adachi M, Nosyreva E, Na ES, Los MF, Cheng P, et al. NMDA receptor blockade

- 628 at rest triggers rapid behavioural antidepressant responses. *Nature* [Internet].  
629 2011;475(7354):91–5. Available from:  
630 [http://www.pubmedcentral.nih.gov/articlerender.fcgi?artid=3172695&tool=pmcentrez&](http://www.pubmedcentral.nih.gov/articlerender.fcgi?artid=3172695&tool=pmcentrez&rendertype=abstract)  
631 [rendertype=abstract](http://www.pubmedcentral.nih.gov/articlerender.fcgi?artid=3172695&tool=pmcentrez&rendertype=abstract)
- 632 53. Hawi Z, Cummins TDR, Tong J, Arcos-Burgos M, Zhao Q, Matthews N, et al. Rare DNA  
633 variants in the brain-derived neurotrophic factor gene increase risk for attention-deficit  
634 hyperactivity disorder: a next-generation sequencing study. *Mol Psychiatry* [Internet].  
635 2017;22(4):580–4. Available from: <http://europepmc.org/abstract/MED/27457811>
- 636 54. Low CG, Luk ISU, Lin D, Fazli L, Yang K, Xu Y, et al. BIRC6 Protein, an Inhibitor of Apoptosis:  
637 Role in Survival of Human Prostate Cancer Cells. *PLoS One*. 2013;8(2):e55837.
- 638 55. Sokka AL, Mudo G, Aaltonen J, Belluardo N, Lindholm D, Korhonen L. Bruce/apollon  
639 promotes hippocampal neuron survival and is downregulated by kainic acid. *Biochem*  
640 *Biophys Res Commun*. 2005;338(2):729–35.
- 641 56. Elferink LA, Anzai K, Scheller RH. rab15, a novel low molecular weight GTP-binding protein  
642 specifically expressed in rat brain. *J Biol Chem*. 1992;267(9):5768–75.
- 643 57. Stenmark H. Rab GTPases as coordinators of vesicle traffic. *Nat Rev Mol Cell Biol*  
644 [Internet]. 2009;10(8):513–25. Available from:  
645 <http://www.ncbi.nlm.nih.gov/pubmed/19603039>
- 646 58. Beites CL, Campbell KA, Trimble WS. The septin Sept5/CDCrel-1 competes with alpha-  
647 SNAP for binding to the SNARE complex. *Biochem J* [Internet]. 2005;385(Pt 2):347–53.  
648 Available from: <http://www.biochemj.org/content/385/2/347.abstract>
- 649 59. Suzuki G, Harper KM, Hiramoto T, Sawamura T, Lee M, Kang G, et al. Sept5 deficiency



- 650 exerts pleiotropic influence on affective behaviors and cognitive functions in mice. *Hum*  
651 *Mol Genet.* 2009;18(9):1652–60.
- 652 60. Harper KM, Hiramoto T, Tanigaki K, Kang G, Suzuki G, Trimble W, et al. Alterations of  
653 social interaction through genetic and environmental manipulation of the 22q11.2 gene  
654 *sept5* in the mouse brain. *Hum Mol Genet.* 2012;21(15):3489–99.
- 655 61. Tadi M, Allaman I, Lengacher S, Grenningloh G, Magistretti PJ. Learning-Induced gene  
656 expression in the hippocampus reveals a role of neuron -Astrocyte metabolic coupling in  
657 long term memory. *PLoS One.* 2015;10(10):1–21.
- 658 62. Lee PH, Anttila V, Won H, Feng Y-CA, Rosenthal J, Zhu Z, et al. Genome wide meta-  
659 analysis identifies genomic relationships, novel loci, and pleiotropic mechanisms across  
660 eight psychiatric disorders. *bioRxiv [Internet].* 2019 Jan 1;528117. Available from:  
661 <http://biorxiv.org/content/early/2019/01/26/528117.abstract>
- 662 63. Gehman LT, Stoilov P, Maguire J, Damianov A, Lin C-H, Shiue L, et al. The splicing  
663 regulator *Rbfox1* (*A2BP1*) controls neuronal excitation in the mammalian brain. *Nat*  
664 *Genet.* 2011 May;43(7):706–11.
- 665 64. Hamada N, Ito H, Iwamoto I, Morishita R, Tabata H, Nagata K. Role of the cytoplasmic  
666 isoform of *RBFOX1/A2BP1* in establishing the architecture of the developing cerebral  
667 cortex. *Mol Autism [Internet].* 2015;6(1):56. Available from:  
668 <https://doi.org/10.1186/s13229-015-0049-5>
- 669 65. Gandal MJ, Haney JR, Parikshak NN, Leppa V, Ramaswami G, Hartl C, et al. Shared  
670 molecular neuropathology across major psychiatric disorders parallels polygenic overlap.  
671 *Science.* 2018 Feb;359(6376):693–7.

- 672 66. Hamada N, Ito H, Nishijo T, Iwamoto I, Morishita R, Tabata H, et al. Essential role of the  
673 nuclear isoform of RBFOX1, a candidate gene for autism spectrum disorders, in the brain  
674 development. *Sci Rep* [Internet]. 2016 Aug 2;6:30805. Available from:  
675 <https://doi.org/10.1038/srep30805>
- 676 67. Fernandez-Castillo N, Gan G, van Donkelaar MMJ, Vaht M, Weber H, Retz W, et al.  
677 RBFOX1, encoding a splicing regulator, is a candidate gene for aggressive behavior. *Eur*  
678 *Neuropsychopharmacol*. 2017 Nov;
- 679 68. Busè M, Cuttaia HC, Palazzo D, Mazara M V, Lauricella SA, Malacarne M, et al. Expanding  
680 the phenotype of reciprocal 1q21.1 deletions and duplications: a case series. *Ital J Pediatr*  
681 [Internet]. 2017 Jul;43(1):61. Available from: <https://doi.org/10.1186/s13052-017-0380-x>
- 682 69. Goodbourn PT, Bosten JM, Bargary G, Hogg RE, Lawrance-Owen AJ, Mollon JD. Variants in  
683 the 1q21 risk region are associated with a visual endophenotype of autism and  
684 schizophrenia. *Genes Brain Behav* [Internet]. 2014;13:144–51. Available from:  
685 <https://doi.org/10.1111/gbb.12096>
- 686 70. Zhang F, Lupski JR. Non-coding genetic variants in human disease. *Hum Mol Genet*. 2015  
687 Oct;24(R1):R102-10.  
688

Figure 1

**a Collection of CNVs from 11 studies**

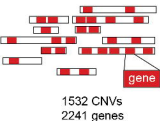

**b Cleaning**

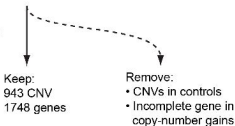

**c Prioritization**

1. Identified in  $> 1$  individual
2. In minimal region of overlap

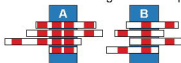

432 high-priority genes

1316 low-priority genes

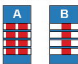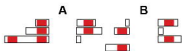



Figure 3

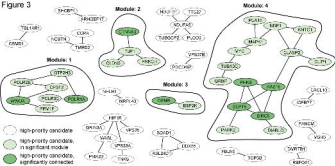

# Figure 4

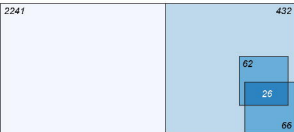

- 2241 genes within ADHD CNVs
- 432 high-priority ADHD candidate genes
- 66 candidates associated to ADHD core cross-species phenotypes
- 62 DAPPLE module proteins
- 26 candidates overlap across analyses

Table 1

| Gene symbol | Full gene name                                    | Gene function                                                                                                                             | Biological themes |
|-------------|---------------------------------------------------|-------------------------------------------------------------------------------------------------------------------------------------------|-------------------|
| COPA        | coatamer protein complex subunit alpha            | protein transport between the endoplasmic reticulum and Golgi compartments                                                                |                   |
| CPSF2       | cleavage and polyadenylation specific factor 2    | pre-mRNA 3-end formation                                                                                                                  | mRNA metabolism   |
| CSMD1       | CUB And Sushi Multiple Domains 1                  | unknown                                                                                                                                   |                   |
| DMRTB1      | DMRT Like Family B With Proline Rich C-Terminal 1 | transcription factor                                                                                                                      | transcription     |
| MAPK1       | Mitogen-Activated Protein Kinase 1                | wide range of cellular processes like proliferation, differentiation, transcription regulation and development                            |                   |
| MSH3        | MutS Homolog 3                                    | DNA mismatch repair                                                                                                                       |                   |
| MYC         | MYC Proto-Oncogene, BHLH Transcription Factor     | transcription factor                                                                                                                      | transcription     |
| NCSTN       | Nicastrin                                         | type I transmembrane glycoprotein                                                                                                         |                   |
| NDUFA5      | NADH:Ubiquinone Oxidoreductase Subunit A5         | subunit of complex I of the mitochondrial respiratory chain                                                                               | mitochondria      |
| NDUFB1      | NADH:Ubiquinone Oxidoreductase Subunit B1         | subunit of complex I of the mitochondrial respiratory chain                                                                               | mitochondria      |
| PARK2       | Parkin RBR E3 Ubiquitin Protein Ligase            | component of a multiprotein E3 ubiquitin ligase complex, degradation of defective mitochondria                                            | mitochondria      |
| PDCD6IP     | Programmed Cell Death 6 Interacting Protein       | functions within the ESCRT pathway                                                                                                        |                   |
| PEA15       | Phosphoprotein Enriched In Astrocytes 15          | negative regulator of apoptosis                                                                                                           |                   |
| PLOD3       | Procollagen-Lysine,2-Oxoglutarate 5-Dioxygenase 3 | homodimeric enzyme in the rough endoplasmic reticulum                                                                                     |                   |
| POLR1A      | RNA Polymerase I Subunit A                        | subunit of the RNA polymerase I complex                                                                                                   | mRNA metabolism   |
| POLR2B      | RNA Polymerase II Subunit B                       | subunit of the RNA polymerase II complex                                                                                                  | mRNA metabolism   |
| POLR3C      | RNA Polymerase III Subunit C                      | subunit of the RNA polymerase III complex                                                                                                 | mRNA metabolism   |
| PPM1F       | Protein Phosphatase, Mg2+/Mn2+ Dependent 1F       | Ser/Thr protein phosphatase                                                                                                               |                   |
| RBFOX1      | RNA Binding Protein, Fox-1 Homolog 1              | regulates tissue-specific alternative splicing                                                                                            |                   |
| SEPT5       | Septin 5                                          | regulation of cytoskeletal organization and SNARE complexes                                                                               | cytoskeleton      |
| TBL1XR1     | Transducin Beta Like 1 X-Linked Receptor 1        | F-box-like protein involved in the recruitment of the ubiquitin/19S proteasome complex to nuclear receptor-regulated transcription units. | transcription     |
| TTC27       | Tetratricopeptide Repeat Domain 27                | unknown                                                                                                                                   |                   |
| TUBA3C      | Tubulin Alpha 3c                                  | major component of microtubules                                                                                                           | cytoskeleton      |
| TUBGCP2     | Tubulin Gamma Complex Associated Protein 2        | microtubule nucleation at the centrosome                                                                                                  | cytoskeleton      |
| WASL        | Wiskott-Aldrich Syndrome Like                     | Regulates actin polymerization                                                                                                            | cytoskeleton      |
| WWOX        | WW Domain Containing Oxidoreductase               | WW Domain Containing Oxidoreductase                                                                                                       |                   |

bioRxiv preprint doi: <https://doi.org/10.1101/769449>; this version posted September 20, 2019. The copyright holder for this preprint (which was not certified by peer review) is the author/funder. All rights reserved. No reuse allowed without permission.
